# Supplementary material
Source: PubMed Central journal article supplement (PMC9029093)
Supplement: bloodBLD2022015470-suppl1.pdf [file bloodBLD2022015470-suppl1.pdf]

## **SUPPLEMENTARY MATERIAL**

### **De novo and relapsed immune thrombocytopenia after COVID-19 vaccines: results of French safety monitoring**

**The French Pharmacovigilance COVID-19 vaccine-ITP study group:** Marine Alt (Strasbourg University hospital), Romain Barus (Lille University hospital), Florelle Bellet (Saint-Etienne University hospital), Marlène Damin-Pernik (Saint-Etienne University hospital), Sophie Fedrizzi (Caen University hospital), Louise Gaboriau (Lille University hospital), Anaïs Gaiffe (Besançon University hospital), Sophie Gautier (Lille University hospital), Aurore Gouraud (Lyon University hospital), Aurélie Grandvullemin (Dijon University hospital), Hubert Labas (Clermont-Ferrand University hospital), Chayma Ladhari (Strasbourg University hospital), Laurence Lagarce (Angers University hospital), Pascale Palassin (Montpellier University hospital), Camille Potey (Lille University hospital), Anne-Lise Ruellan (Nantes University hospital), Gwenaëlle Veyrac (Nantes University hospital), Thierry Vial (Lyon University hospital), Delphine Viard (Nice University hospital).

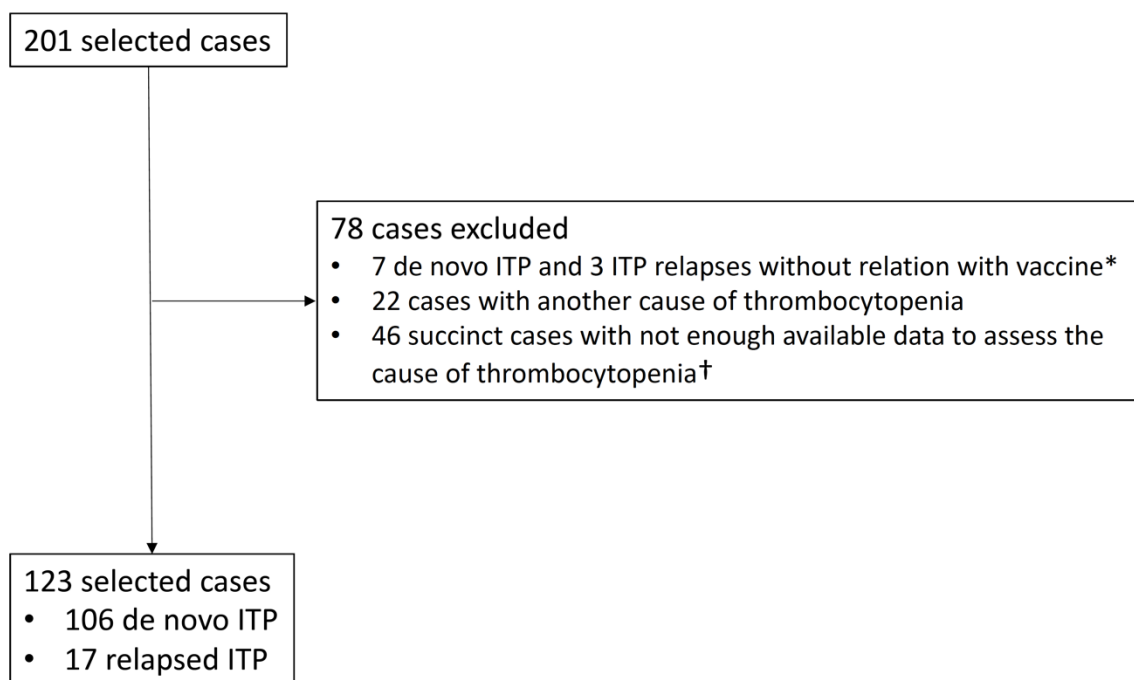

**Figure S1.** Flowchart of case selection after review by two ITP experts.

\*Mostly due to a longer time from vaccine to the event.

†Usually mild thrombocytopenia without further investigation.

**Table S1.** Description of the two cases of intracranial hemorrhages that occurred.

| <b>Case</b> | <b>Description</b>                                                                                                                                                                                                                                                                                                                                                                   |
|-------------|--------------------------------------------------------------------------------------------------------------------------------------------------------------------------------------------------------------------------------------------------------------------------------------------------------------------------------------------------------------------------------------|
| #1          | A 84-year-old woman with Alzheimer disease and a history of ischemic stroke developed ITP 20 days after a first dose of BNT162b2 with a platelet count of $1 \times 10^9/L$ , petechiae, bruises, asymptomatic frontal 5 mm bleed on cranial computed tomography, with favorable response to corticosteroids and IVIg (categorized as certain de novo ITP).                          |
| #2          | A 63-year-old man with chronic lymphocytic leukemia and severe arterial hypertension was admitted for intracranial bleed ten days after a second dose of BNT162b2; platelet count was normal at admission but dropped four days later to $9 \times 10^9/L$ , responsible for major aggravation of the intracranial bleed and eventually death (categorized as probable de novo ITP). |

**Table S2.** Characteristics of cases of de novo immune thrombocytopenia (ITP) following COVID-19 vaccination by groups of certain and probable ITP.

| Characteristics                                                       | Certain ITP (n=58) | Probable ITP (n=48) |
|-----------------------------------------------------------------------|--------------------|---------------------|
| Median age, years (min-max)                                           | 67 (16-94)         | 69 (17-98)          |
| Women, n (%)                                                          | 33 (56.9)          | 24 (50.0)           |
| History of autoimmune disease, n (%)*                                 | 11 (18.9)          | 12 (16.7)           |
| Vaccine                                                               |                    |                     |
| BNT162b2, n (%)                                                       | 35                 | 23                  |
| ChadOx1-S, n (%)                                                      | 20                 | 25                  |
| mRNA-1273, n (%)                                                      | 2                  | 0                   |
| Ad26COV2, n (%)                                                       | 1                  | 0                   |
| Dose†                                                                 |                    |                     |
| 1, n (%)                                                              | 41 (73.2)          | 33 (70.2)           |
| 2, n (%)                                                              | 15 (26.8)          | 14 (29.8)           |
| Median time to ITP onset, days (min-max)                              | 12 (1-40)          | 10 (2-40)           |
| Median lowest platelet count, x 10 <sup>9</sup> /L (min-max)‡         | 4 (0-36)           | 15 (1-87)           |
| Bleeding§                                                             |                    |                     |
| No bleeding, n (%)                                                    | 3 (5.4)            | 16 (34.8)           |
| All bleeding, n (%)                                                   | 53 (94.6)          | 30 (65.2)           |
| Mouth bullae, n (%)                                                   | 20 (35.7)          | 2 (4.4)             |
| Epistaxis, n (%)                                                      | 6 (10.7)           | 0                   |
| Hemoptysis, n (%)                                                     | 1 (1.8)            | 0                   |
| Intracranial, n (%)                                                   | 1 (1.8)            | 1 (2.2)             |
| Evolution and treatment¶                                              |                    |                     |
| Spontaneous recovery, n (%)                                           | 1 (1.9)            | 10 (30.3)           |
| Recovery after corticosteroids ± IVIg only, n (%)                     | 40 (76.9)          | 16 (48.5)           |
| Recovery after need of TPORAs as second-line treatment, n (%)         | 8 (15.4)           | 1 (3.0)             |
| Recovery after need of rituximab as second-line treatment, n (%)      | 1 (1.9)            | 2 (6.1)             |
| Recovery after need of dapsone as second-line treatment, n (%)        | 1 (1.9)            | 0                   |
| Recovery after TPORA first, n (%)                                     | 0                  | 1 (3.0)             |
| Active disease after corticosteroids without further follow-up, n (%) | 2 (3.8)            | 3 (9.1)             |
| Exposure to another dose of vaccine                                   |                    |                     |
| Relapse of ITP, n                                                     | 2                  | 1                   |
| No relapse of ITP, n                                                  | 1                  | 3                   |
| Absence of subsequent exposure to the vaccine, n                      | 36                 | 18                  |
| Unknown, n                                                            | 19                 | 26                  |

Abbreviations:

IVIg, intravenous immunoglobulin; ITP, immune thrombocytopenia; TPORA, thrombopoietin receptor agonist.

\* 5 patients with thyroiditis (including 2 Graves' disease), 2 with thyroiditis + psoriasis, 1 with thyroiditis + rheumatoid arthritis, 1 with systemic lupus erythematosus, 1 with sarcoidosis, 1 with granulomatosis with polyangiitis, 1 with autoimmune hemolytic anemia, 1 with rheumatoid arthritis, 1 with polymyalgia rheumatica, 1 with primary biliary cirrhosis + Biermer anemia, 1 with Behçet disease, 1 with multiple sclerosis 1 type 1 diabetes mellitus and 1 with extramembranous glomerulonephritis.

† 3 missing values (certain ITP, n=2; probable ITP, n=2).

‡ 1 missing value (certain ITP).

§ 4 missing values (certain ITP, n=2; probable ITP, n=2).

¶ 21 missing values (certain ITP, n=6; probable ITP, n=15).

**Table S3.** Incidence de novo/relapsed immune thrombocytopenia (ITP) within the six weeks after COVID-19 vaccination reported by number of vaccine doses dispensed.

| Characteristics            | Number of reported cases | Number of doses dispensed | Number of reported cases by 1,000,000 doses (95% CI) |
|----------------------------|--------------------------|---------------------------|------------------------------------------------------|
| <b>All doses</b>           |                          |                           |                                                      |
| All de novo/relapsed ITP   | 123*                     | 72,752,106                | 1.69 (1.42-2.01)                                     |
| BNT162b2 (Pfizer-BioNTech) | 70†                      | 57,232,186                | 1.22 (0.97-1.54)                                     |
| ChadOx1-S (AstraZeneca)    | 47‡                      | 7,679,746                 | 6.12 (4.63-8.04)                                     |
| mRNA-1273 (Moderna)        | 5§                       | 6,996,846                 | 0.71 (0.30-15.60)                                    |
| Ad26COV2 (Janssen)         | 1¶                       | 843,328                   | 1.19 (0.02-0.67)                                     |
| <b>After Dose 1</b>        |                          |                           |                                                      |
| All de novo/relapsed ITP   | 86                       | 41,673,001                | 2.06 (1.67-2.55)                                     |
| BNT162b2 (Pfizer-BioNTech) | 41                       | 32,450,088                | 1.26 (0.93-1.71)                                     |
| ChadOx1-S (AstraZeneca)    | 41                       | 4,358,285                 | 9.41 (7.00-12.50)                                    |
| mRNA-1273 (Moderna)        | 4                        | 4,021,300                 | 1.00 (0.39-2.54)                                     |
| Ad26COV2 (Janssen)         | -                        | 843,328                   | -                                                    |
| <b>After Dose 2</b>        |                          |                           |                                                      |
| All de novo/relapsed ITP   | 34                       | 30,998,538                | 1.10 (0.79-1.53)                                     |
| BNT162b2 (Pfizer-BioNTech) | 28                       | 24,710,406                | 1.13 (0.78-1.63)                                     |
| ChadOx1-S (AstraZeneca)    | 5                        | 3,319,256                 | 1.51 (0.06-3.48)                                     |
| mRNA-1273 (Moderna)        | 1                        | 2,968,876                 | 0.34 (0.06-1.89)                                     |
| Ad26COV2 (Janssen)         | 0                        | 0                         | -                                                    |
| <b>After Dose 3</b>        |                          |                           |                                                      |
| All de novo/relapsed ITP   | 0                        | 80,567                    | -                                                    |
| BNT162b2 (Pfizer-BioNTech) | 0                        | 71,692                    | -                                                    |
| ChadOx1-S (AstraZeneca)    | 0                        | 2,205                     | -                                                    |
| mRNA-1273 (Moderna)        | 0                        | 6,670                     | -                                                    |
| Ad26COV2 (Janssen)         | 0                        | 0                         | -                                                    |

\*106 de novo (74 after Dose 1 and 29 after Dose 2; 3 missing values) and 17 relapsed ITP (12 after Dose 1 and 5 after Dose 2). No case of ITP was reported after Dose 3 during the study period.

†58 de novo (34 after Dose 1 and 23 after Dose 2; 1 missing value) and 12 relapsed ITP (7 after Dose 1 and 5 after Dose 2).

‡45 de novo (39 after Dose 1 and 5 after Dose 2; 1 missing value) and 2 relapsed ITP (after Dose 1).

§2 de novo (1 after Dose 1 and 1 after Dose 2) and 3 relapsed ITP (after Dose 1).

¶1 de novo (Dose rank unknown) and no relapsed ITP.
